# Supplementary material
Source: HighWire-hosted journal article supplement (http://www.jneurosci.org/highwire/filestream/597804/field_highwire_adjunct_files/0/TableS1.pdf)
Supplement: TableS1.pdf [file TableS1.pdf]

Table S1. Celebrity biographical cues organized by set.

**Set 1**

| Name                                                                                                                                                                                                                                                                                                                                                                                                                                                                                                                                                                                                                                                                                                                                                                                                                                                                                                                                                                                                                                                                                                                    | Cue 1                                                                                                                                                                                                                                                                                                                                                                                                                                                                                                                                                                                                                                                                                                                                                                                                                                                                                                                                                                                                                                                                                                                                                                                                                                                                                       | Cue 2                                                                                                                                                                                                                                                                                                                                                                                                                                                                                                                                                                                                                                                                                                                                                                                                                                                                                                                                                                                                                                                                                                                                                                                                                                                                                                                                                                            |
|-------------------------------------------------------------------------------------------------------------------------------------------------------------------------------------------------------------------------------------------------------------------------------------------------------------------------------------------------------------------------------------------------------------------------------------------------------------------------------------------------------------------------------------------------------------------------------------------------------------------------------------------------------------------------------------------------------------------------------------------------------------------------------------------------------------------------------------------------------------------------------------------------------------------------------------------------------------------------------------------------------------------------------------------------------------------------------------------------------------------------|---------------------------------------------------------------------------------------------------------------------------------------------------------------------------------------------------------------------------------------------------------------------------------------------------------------------------------------------------------------------------------------------------------------------------------------------------------------------------------------------------------------------------------------------------------------------------------------------------------------------------------------------------------------------------------------------------------------------------------------------------------------------------------------------------------------------------------------------------------------------------------------------------------------------------------------------------------------------------------------------------------------------------------------------------------------------------------------------------------------------------------------------------------------------------------------------------------------------------------------------------------------------------------------------|----------------------------------------------------------------------------------------------------------------------------------------------------------------------------------------------------------------------------------------------------------------------------------------------------------------------------------------------------------------------------------------------------------------------------------------------------------------------------------------------------------------------------------------------------------------------------------------------------------------------------------------------------------------------------------------------------------------------------------------------------------------------------------------------------------------------------------------------------------------------------------------------------------------------------------------------------------------------------------------------------------------------------------------------------------------------------------------------------------------------------------------------------------------------------------------------------------------------------------------------------------------------------------------------------------------------------------------------------------------------------------|
| Angelina Jolie<br>Aretha Franklin<br>Barbara Streisand<br>Brandy<br>Calista Flockhart<br>Carmen Electra<br>Catherine Zeta Jones<br>Cher<br>Christina Aguilera<br>Christina Ricci<br>Claudia Schiffer<br>Demi Moore<br>Elizabeth Hurley<br>Goldie Hawn<br>Halle Berry<br>Helen Hunt<br>Jamie Lee Curtis<br>Janeane Garofalo<br>Janet Reno<br>Jennifer Love Hewitt<br>Jenny Jones<br>Joan Lunden<br>Julia Louis Dreyfus<br>Juliette Lewis<br>Katie Holmes<br>Kelly Rowland<br>Kirstie Alley<br>Lida Kudrow<br>Lucy Liu<br>Madonna<br>Marla Shriver<br>Michelle Pfeiffer<br>Mira Sorvino<br>Missy Elliot<br>Nicole Kidman<br>Oprah Winfrey<br>Pink<br>Queen Latifah<br>Renee Zellweger<br>Roseanne Arnold<br>Sandra Bullock<br>Shannon Doherty<br>Reba McEntire<br>Rosie O'Donnell<br>Sarah Ferguson<br>Tyra Banks<br>Adam Sandler<br>Alex Trebek<br>Albert Einstein<br>Antonio Banderas<br>Ben Stiller<br>Bill Maher<br>Bob Costas<br>Christopher Reeves<br>Conan O'Brien<br>Dan Rather<br>David Arquette<br>David Letterman<br>David Spade<br>Dustin Hoffman<br>Emilio Esteves<br>Eminem<br>Harrison Ford<br>Harry Caray | Laura Croft Tomb Raider<br>Sang 'Respect'<br>Sang 'You Don't Buy Me Flowers'<br>Sang 'That Boy is Mine'<br>Allie McBeal<br>Till Death Do Us Part<br>Chicago<br>Sang 'Believe'<br>Sang 'Dirty'<br>Sleepy Hollow<br>Supermodel<br>G.I. Jane<br>Austin Powers<br>The Banger Sisters<br>Monster's Ball<br>As Good as it Gets<br>Freaky Friday<br>Comedian and actress<br>1st female Attorney General<br>Sang 'Bare Naked'<br>Daytime talk show hostess<br>Good Morning America<br>Elaine on Seinfeld<br>Starsky & Hutch<br>Joey on Dawson's Creek<br>Destiny's Child<br>Look Who's Talking mother<br>Phoebe on Friends<br>Charlie's Angels<br>Sang 'Like a Virgin'<br>First Lady of California<br>I am Sam<br>Summer of Sam<br>Sang 'Pass the Dutch'<br>The Hours<br>Hosts Oprah<br>Sang 'You make me sick'<br>Chicago<br>Chicago<br>Roseanne<br>Miss Congeniality<br>Hosts Scare Tactics<br>country music singer<br>Rosie talk show<br>Former Duchess of York<br>Victoria's Secret model<br>Billy Madison<br>Jeopardy Host<br>Patent Clerk<br>Spy Kids father<br>Meet the Parents<br>Politically Incorrect<br>Sportscaster<br>Superman<br>Late Show<br>CBS evening news<br>Eight-Legged Freaks<br>Late Night<br>Joe Dirt<br>Rainman<br>Mighty Ducks<br>8 Mile<br>Indiana Jones<br>Sportscaster | Gone in 60 Seconds<br>Queen of Motown<br>Prince of Tides<br>Show of pregnancy<br>A Midsummer Night's Dream<br>Scarry Movie<br>Traffic<br>Sang 'And the Beat Goes On'<br>Sang 'Beautiful'<br>Monster<br>Zoolander<br>Strip Tease<br>Estee Lauder spokeswoman<br>First Wives' Club<br>Bond Girl<br>Mad About You<br>Halloween movies<br>Mystery Men<br>Parkinson's disease<br>Party of Five<br>Show taped in Chicago<br>Spokesperson for Vaseline Intensive Care<br>Watching Ellie sitcom<br>Natural Born Killers<br>Phone Booth<br>album 'Simply Deep'<br>Cheers<br>Analyze This<br>Kill Bill<br>Sang 'Like a Prayer'<br>Ex-news reporter<br>White Oleander<br>Mighty Aphrodite<br>Sang 'One Minute Man'<br>Moulin Rouge<br>Wealthiest woman in America<br>Sang 'Just like a pill'<br>Bringing Down the House<br>Bridget Jones's Diary<br>Bad national anthem<br>Forces of Nature<br>Beverly Hills 90210<br>Reba sitcom<br>Recent same-sex marriage<br>Spokesperson for Weight-Watchers<br>Halloween: Resurrection<br>50 First Dates<br>Gameshow host Emmy nominee<br>Relativity Theory<br>Once Upon a Time in Mexico<br>Starsky and Hutch<br>Political activist<br>Internight host<br>Paraplegic<br>Comic insult dog<br>60 Minutes II<br>Scream movies<br>Stupid human tricks<br>Tommy Boy<br>The Graduate<br>Young Guns<br>Sang 'Lose Yourself'<br>Han Solo<br>Restaurant chain |

| Name                                                                                                                                                                                                                                                                                                                                                                                                                                                          | Cue 1                                                                                                                                                                                                                                                                                                                                                                                                                                                                                                                  | Cue 2                                                                                                                                                                                                                                                                                                                                                                                                                                                                                                                                                         |
|---------------------------------------------------------------------------------------------------------------------------------------------------------------------------------------------------------------------------------------------------------------------------------------------------------------------------------------------------------------------------------------------------------------------------------------------------------------|------------------------------------------------------------------------------------------------------------------------------------------------------------------------------------------------------------------------------------------------------------------------------------------------------------------------------------------------------------------------------------------------------------------------------------------------------------------------------------------------------------------------|---------------------------------------------------------------------------------------------------------------------------------------------------------------------------------------------------------------------------------------------------------------------------------------------------------------------------------------------------------------------------------------------------------------------------------------------------------------------------------------------------------------------------------------------------------------|
| Jason Alexander<br>Jay Leno<br>Jesse Jackson<br>John Goodman<br>John Lennon<br>John Travolta<br>Joshua Jackson<br>Kelsey Grammer<br>Leonardo Dicaprio<br>LL Cool J<br>Marilyn Manson<br>Matt Damon<br>Matthew Broderick<br>Michael Jackson<br>Michael J. Fox<br>Norm Macdonald<br>Notorious B.I.G.<br>Peter Jennings<br>Prince William<br>Richard Gere<br>Richard Nixon<br>Roger Ebert<br>Robin Williams<br>Rudy Giuliani<br>Sean Connery<br>Shaquille O'Neal | George on Seinfeld<br>Late Night<br>Campaigned for presidency<br>Roseanne husband<br>Sang 'Imagine'<br>Swordfish<br>Pacey on Dawson's Creek<br>Frasier<br>Gangs of New York<br>album 'Phenomenon'<br>Bowling for Columbine<br>Rounders<br>Ferris Beuler<br>Sang 'Thriller'<br>Back to the Future<br>Saturday Night Live<br>Biggie Smalls<br>World News Tonight<br>Prince of Wales<br>Chicago<br>Resigned from Presidency<br>Film Critic<br>Insomnia<br>Former mayor of NYC<br>Original James Bond<br>Basketball player | Shallow Hal<br>Classic car collector<br>Religious political activist<br>Oh brother, where art thou?<br>shot in 1980<br>Saturday Night Fever<br>Cruel Intentions<br>Cheers<br>Titanic<br>album 'Walking with the Panther'<br>Sang 'Beautiful People'<br>Saving Private Ryan<br>Inspector Gadget<br>Jackson Five<br>Teenwolf<br>Dirty Work<br>died in 1997<br>The Century co-author<br>Lives in Windsor Palace<br>Primal Fear<br>President during Vietnam War<br>Sun Times columnist<br>Death to Smoochy<br>Times 2001 person of the year<br>The Rock<br>Shazam |

## Set 2

| Name                                                                                                                                                                                                                                                                                                                                                                                                                                                                                                                                                                                                      | Cue 1                                                                                                                                                                                                                                                                                                                                                                                                                                                                                                                                                                                                                                                                                                                                           | Cue 2                                                                                                                                                                                                                                                                                                                                                                                                                                                                                                                                                                                                                                                                                                                                                                                                                          |
|-----------------------------------------------------------------------------------------------------------------------------------------------------------------------------------------------------------------------------------------------------------------------------------------------------------------------------------------------------------------------------------------------------------------------------------------------------------------------------------------------------------------------------------------------------------------------------------------------------------|-------------------------------------------------------------------------------------------------------------------------------------------------------------------------------------------------------------------------------------------------------------------------------------------------------------------------------------------------------------------------------------------------------------------------------------------------------------------------------------------------------------------------------------------------------------------------------------------------------------------------------------------------------------------------------------------------------------------------------------------------|--------------------------------------------------------------------------------------------------------------------------------------------------------------------------------------------------------------------------------------------------------------------------------------------------------------------------------------------------------------------------------------------------------------------------------------------------------------------------------------------------------------------------------------------------------------------------------------------------------------------------------------------------------------------------------------------------------------------------------------------------------------------------------------------------------------------------------|
| Barbara Walters<br>Beyonce Knowles<br>Britney Spears<br>Celine Dion<br>Christina Applegate<br>Chyna<br>Cindy Crawford<br>Courney Cox<br>Courtney Love<br>Ellen Degeneres<br>Gwen Stefani<br>Gwenyth Paltrow<br>Hillary Clinton<br>Jane Pauley<br>Janet Jackson<br>Jennifer Aniston<br>Jennifer Lopez<br>Jewel<br>Jodie Foster<br>Judge Judy<br>Julia Roberts<br>Kate Winslet<br>Katie Couric<br>Kirsten Dunst<br>Lara Flynn Boyle<br>Liv Tyler<br>Maria Carey<br>Maya Angelou<br>Melissa Joan Hart<br>Minnie Driver<br>Monica Lewinsky<br>Neve Campbell<br>Paula Abdul<br>Penelope Cruz<br>Princess Diana | 20/20<br>Sang 'Crazy in Love'<br>Sang 'Hit me Baby One More Time'<br>Sang 'My heart will go on'<br>Married with Children<br>Playboy<br>90's model<br>Monica on Friends<br>Hole lead singer<br>Finding Nemo<br>No Doubt lead singer<br>Shakespeare in Love<br>Former First Lady<br>Dateline NBC<br>Sang 'All for you'<br>Rachel on Friends<br>Sang 'Jenny from the Block'<br>Sang 'Who will save your soul?'<br>Silence of the Lambs<br>TV Judge<br>Pretty Woman<br>Titanic<br>Today Show<br>Spiderman<br>The Practice<br>Armageddon<br>Sang 'Butterfly'<br>Sang 'I know why the caged bird sings'<br>Sabrina the Teenage Witch<br>Circle of Friends<br>White House intern<br>Party of Five<br>American Idol<br>Vanilla Sky<br>Princess of Wales | The View<br>Destiny's Child<br>Sang 'Oops, I did it again'<br>Married her older manager<br>The Sweetest Thing<br>Female professional wrestler<br>Pepsi spokesperson<br>Scream movies<br>Married Kurt Cobain<br>Ellen sitcom<br>Sang 'I'm just a girl'<br>Shallow Hal<br>Senator of New York<br>Longtime Today anchor<br>Clothing malfunction<br>Office Space<br>The Wedding Planner<br>Sang 'Foolish Games'<br>Panic Room<br>Worked in NY family court<br>Mona Lisa Smile<br>Eternal Sunshine of the Spotless Mind<br>Colon cancer spokesperson<br>Bring It On<br>Ballerina Dress at Golden Globes<br>Lord of the Rings<br>Sang 'Heartbreaker'<br>Presidential inaugural poem<br>Clarissa Explains it All<br>Good Will Hunting<br>Presidential sex scandal<br>Scream movies<br>Sang 'Straight Up'<br>BLOW<br>Died in car crash |

| Name                                                                                                                                                                                                                                                                                                                                                                                                                                                                                                                                                                                                                                                                                                                                                                                                                                                                                                                   | Cue 1                                                                                                                                                                                                                                                                                                                                                                                                                                                                                                                                                                                                                                                                                                                                                                                                                                                                                                                                                                                                                                                                                                    | Cue 2                                                                                                                                                                                                                                                                                                                                                                                                                                                                                                                                                                                                                                                                                                                                                                                                                                                                                                                                                                                                                                                                                                                                                 |
|------------------------------------------------------------------------------------------------------------------------------------------------------------------------------------------------------------------------------------------------------------------------------------------------------------------------------------------------------------------------------------------------------------------------------------------------------------------------------------------------------------------------------------------------------------------------------------------------------------------------------------------------------------------------------------------------------------------------------------------------------------------------------------------------------------------------------------------------------------------------------------------------------------------------|----------------------------------------------------------------------------------------------------------------------------------------------------------------------------------------------------------------------------------------------------------------------------------------------------------------------------------------------------------------------------------------------------------------------------------------------------------------------------------------------------------------------------------------------------------------------------------------------------------------------------------------------------------------------------------------------------------------------------------------------------------------------------------------------------------------------------------------------------------------------------------------------------------------------------------------------------------------------------------------------------------------------------------------------------------------------------------------------------------|-------------------------------------------------------------------------------------------------------------------------------------------------------------------------------------------------------------------------------------------------------------------------------------------------------------------------------------------------------------------------------------------------------------------------------------------------------------------------------------------------------------------------------------------------------------------------------------------------------------------------------------------------------------------------------------------------------------------------------------------------------------------------------------------------------------------------------------------------------------------------------------------------------------------------------------------------------------------------------------------------------------------------------------------------------------------------------------------------------------------------------------------------------|
| Reese Witherspoon<br>Ricki Lake<br>Rose McGowan<br>Sally Fields<br>Sally Jesse Raphael<br>Selma Hayek<br>Sharon Stone<br>Sheryl Crow<br>Suzanne Sommers<br>Uma Thurman<br>Al Gore<br>Bill Clinton<br>Bob Barker<br>Charles Barkley<br>Colin Powell<br>Cuba Gooding Jr.<br>Dana Carvey<br>David Schwimmer<br>Drew Carey<br>Ed Norton<br>Elton John<br>George Clooney<br>George W. Bush<br>Hugh Downs<br>James Van Der Beek<br>Jerry Springer<br>JFK Jr.<br>Jim Carrey<br>Johnny Depp<br>Josh Hartnett<br>Justin Timberlake<br>Keanu Reeves<br>Kevin Bacon<br>Mahatma Gandhi<br>Marv Albert<br>Matt LeBlanc<br>Matthew Perry<br>Mel Gibson<br>Michael Jordan<br>Mike Meyers<br>OJ Simpson<br>Pierce Brosnan<br>Prince Charles<br>Puff Daddy<br>Ricki Martin<br>Ronald Regan<br>Robert Redford<br>Russell Crowe<br>Saddam Hussein<br>Seth Green<br>Simon Cowell<br>Ted Koppel<br>Tobey McGuire<br>Tom Hanks<br>Val Kilmer | Legally Blonde<br>Hairspray<br>Jawbreaker<br>Forest Gump<br>Daytime talk show hostess<br>Frida<br>Basic Instinct<br>Sang 'All I wanna do'<br>Three's Company<br>Pulp Fiction<br>Former Vice President<br>Former governor of Arkansas<br>The Price is Right<br>Basketball "Dream Team"<br>Secretary of State<br>Jerry McGuire<br>CNL Church Lady<br>Ross on Friends<br>The Drew Carey Show<br>Fight Club<br>Sang 'Candle in the Wind'<br>E.R. Doctor<br>President of U.S.<br>20/20<br>Dawson on Dawson's Creek<br>Former mayor of Cincinnati<br>George magazine<br>Dumb and Dumber<br>Pirates of the Caribbean<br>Pear Harbor<br>N'Sync<br>The Matrix<br>Footloose<br>Passive resistance<br>Sports announcer<br>Joey on Friends<br>Chandler on Friends<br>The Passion<br>Chicago Bulls number 13<br>Wayne's World<br>Murder defendant<br>Newest James Bond<br>Prince of Wales<br>P. Diddy<br>Sang 'Livin' La Vida Loca'<br>President and actor<br>Horse Whisperer<br>Gladiator<br>Former Iraqi President<br>The Italian Job<br>American Idol<br>Nightline anchor<br>Spiderman<br>Forest Gump<br>The Saint | Cruel Intentions<br>Daytime talk show hostess<br>Charmed<br>The Flying Nun<br>Red glasses<br>Once Upon a Time in Mexico<br>Casino<br>Sang 'Strong Enough'<br>Thighmaster<br>Kill Bill<br>Lost 2002 Presidential election<br>Presidential sex scandal<br>Happy Gilmore<br>NBA studio commentator<br>4-star General U.S. Army<br>Radio<br>Wayne's World<br>The Pallbearer<br>Whose line is it anyway?<br>American History X<br>Sang 'Tiny Dancer'<br>Ocean's 11<br>War on Terror<br>ABC news team anchor<br>Varsity Blues<br>Trashy talk show<br>Died in private plane crash<br>Ace Ventura<br>BLOW<br>40 Days and 40 Nights<br>Sang 'Justified'<br>Bill and Ted's Excellent Adventure<br>Mystic River<br>Fasted to quell riots<br>Sex scandal<br>Charlie's Angels<br>Fools Rush In<br>Braveheart<br>Hanes Underware ads<br>Austin Powers<br>White Bronco<br>The Thomas Crowne Affair<br>Affair with Camilla<br>Bad Boy Records<br>Sang 'She Bangs'<br>Iran Contra scandal<br>Indecent Proposal<br>Master and Commander<br>Invaded Kuwait<br>Austin Powers<br>Record producer<br>Nightline managing editor<br>Seabiscuit<br>Apollo 13<br>Batman Forever |
